# Supplementary material for: Light and complex 3D MoS2/graphene heterostructures as efficient catalysts for the hydrogen evolution reaction
Source: Royal Society of Chemistry journal article supplement (doi:10.1039/c9nr09564k), 2020-01-01
Supplement: c9nr09564k1.pdf [file c9nr09564k1.pdf]

## Supporting Information

### Light and Complex 3D MoS<sub>2</sub>/Graphene Heterostructures as a Highly Efficient Catalyst for the Hydrogen Evolution Reaction

Jonah Teich,<sup>\*\*</sup> Ravit Dvir,<sup>\*\*</sup> Alex Henning,<sup>\*§</sup> Eliran Hamo,<sup>†</sup> Michael J. Moody,<sup>§</sup> Titel Jurca,<sup>‡</sup> Hagai Cohen,<sup>⊥</sup> Tobin J. Marks,<sup>‡§</sup> Brian A. Rosen,<sup>†</sup> Lincoln J. Lauhon<sup>§</sup> and Ariel Ismach<sup>†#</sup>

<sup>†</sup> Department of Materials Science and Engineering, Tel Aviv University, Ramat Aviv, Tel Aviv, 6997801, Israel

<sup>§</sup> Department of Materials Science and Engineering, Northwestern University, Evanston, IL 60208, United States

<sup>‡</sup> Department of Chemistry, Northwestern University, Evanston, IL 60208, United States

<sup>⊥</sup> Weizmann Inst Science, Department of Chemical Research Support, IL-76100 Rehovot, Israel

\* These authors contributed equally to this work

# E-mail: aismach@tauex.tau.ac.il

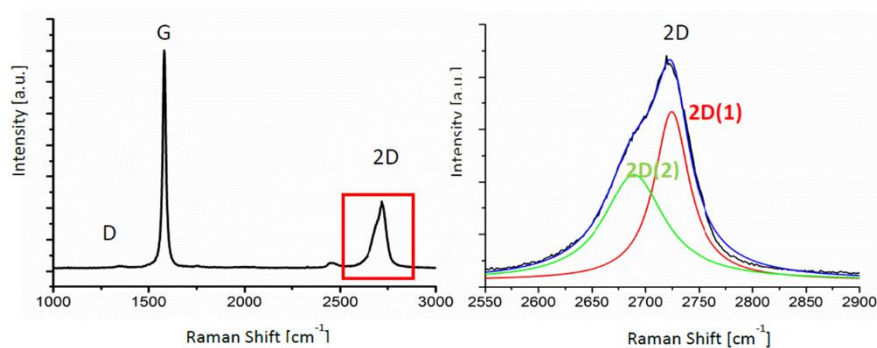

**Figure S1: Raman spectroscopy of the graphitic foams.** (a) D, G and 2D band positions. (b) Fitting of the 2D peak shows a characteristic AB-stacking graphitic mode.

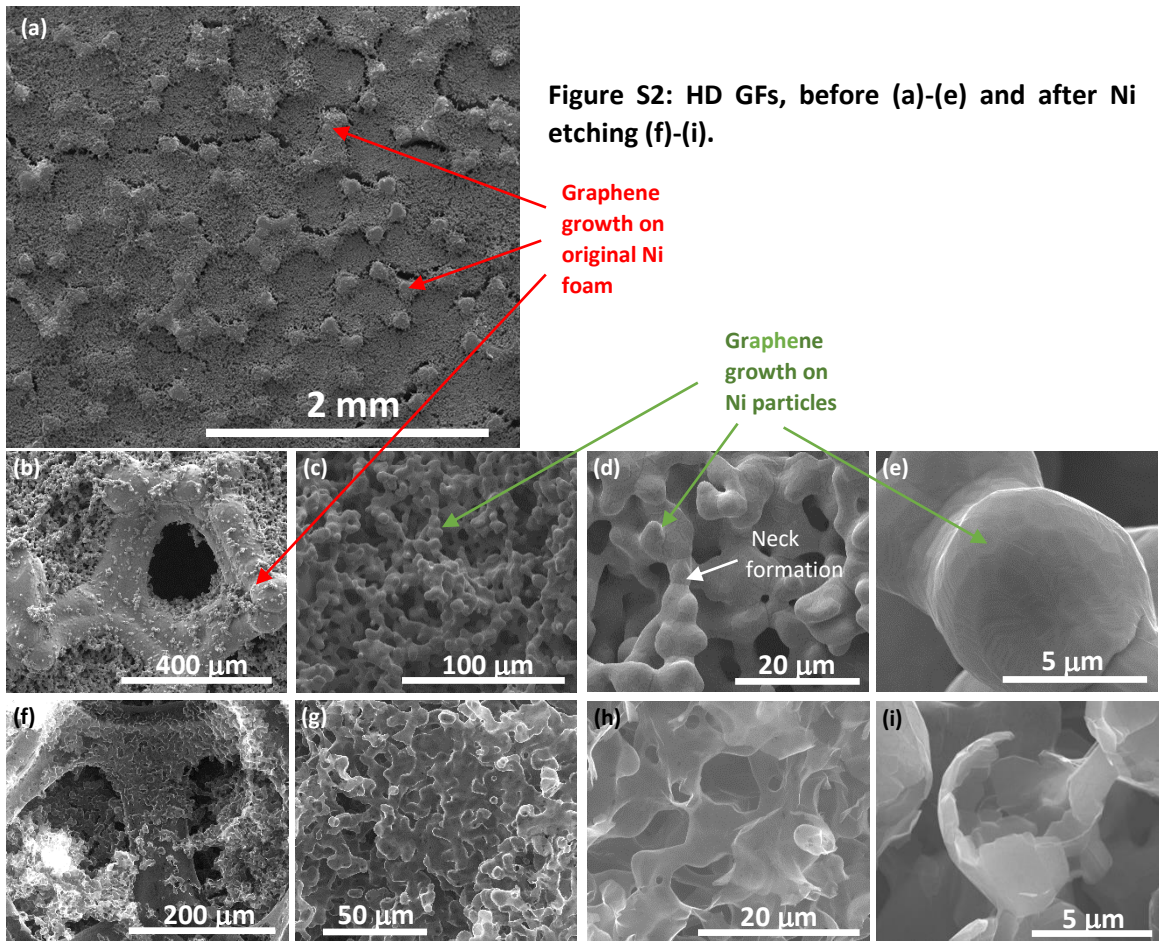

Table S1: Resistivity of the different graphene foams

| Sample | Resistivity [ $\Omega\text{m}$ ] |
|--------|----------------------------------|
| LD GF  | 0.053                            |
| HD GF  | 0.027                            |

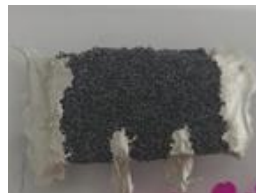

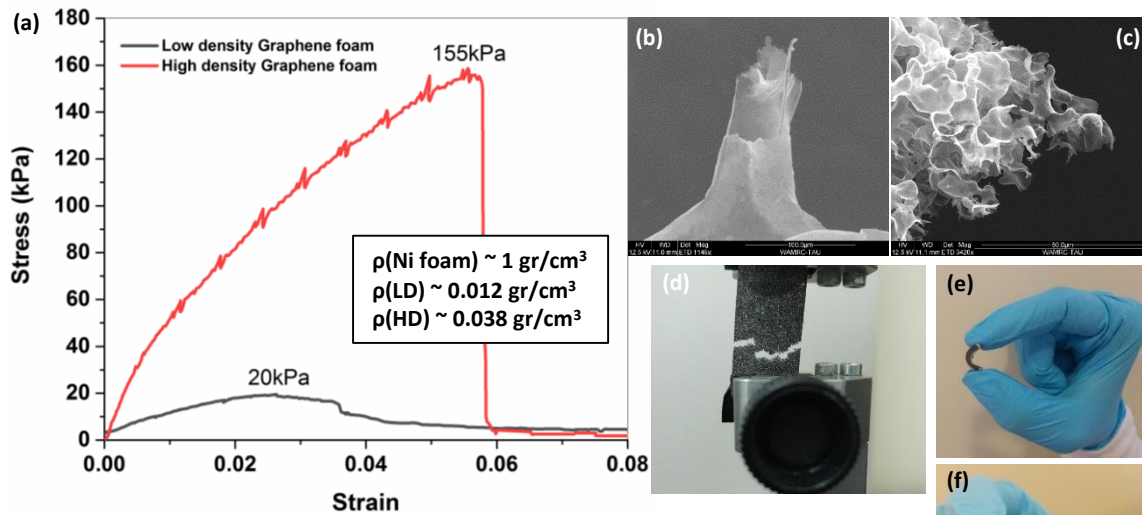

**Figure S3: Tensile test of the standard and high density GF.** (a) Tensile test results for the LD (black) and HD (red) GFs. (b)-(c) SEM images of the crack region for the LD and HD-GFs, respectively. (d) Optical image showing the set-up and the LD-GF failure. (e) – (f) PDMS-GF composites.

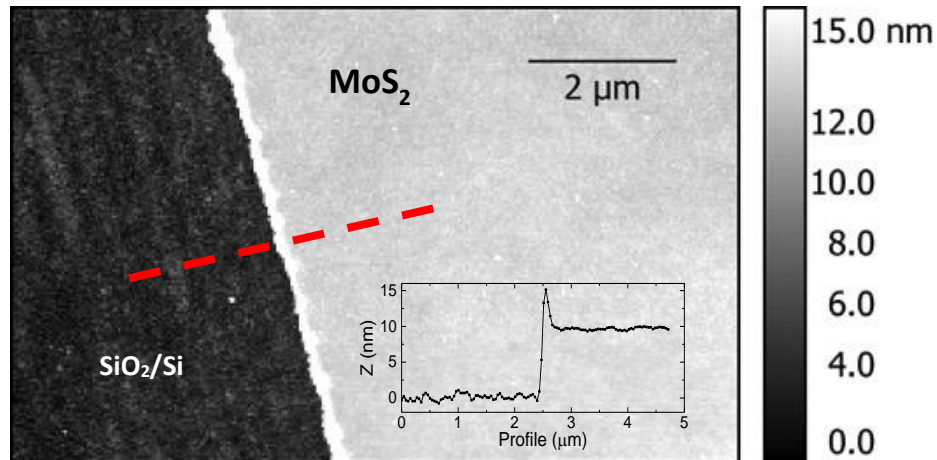

**Figure S4: Atomic force microscopy of the 10 nm (100 cycles)  $\text{MoS}_2$  film.** The inset shows the cross section along the red line.

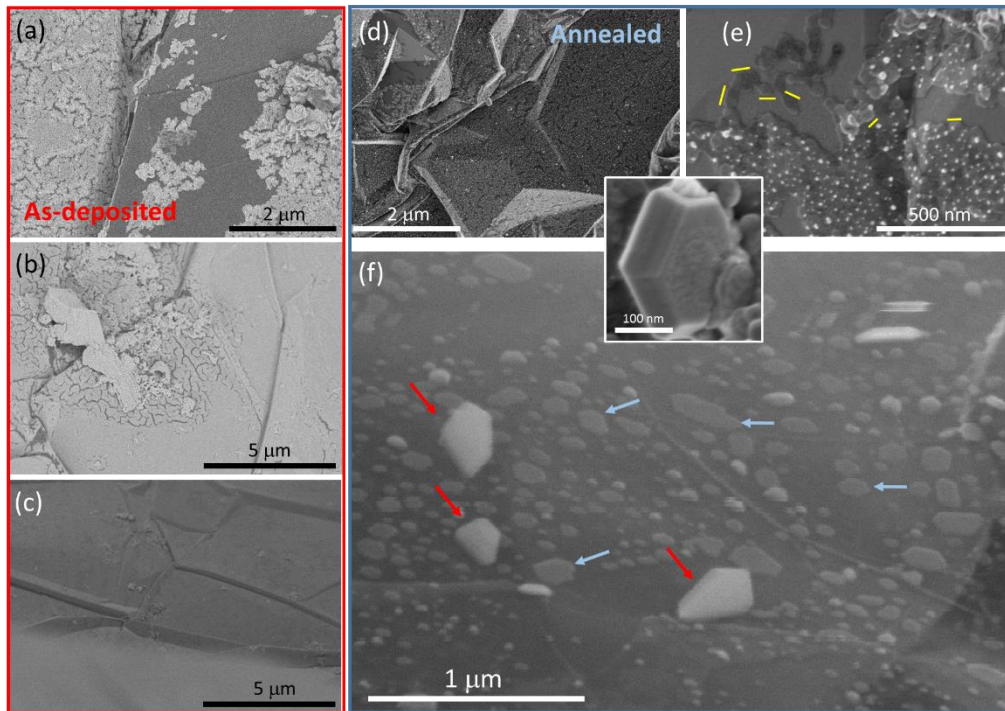

**Figure S5: MoS<sub>2</sub> film Morphology before and after annealing:** (a) BSE image showing the MoS<sub>2</sub> (bright) and the GF (dark) at the foam edge and (b) in an inner area of the foam. (c) SE image showing a smooth continuous film as deposited. (d)-(f) SEM images showing the formation of 100-400 nm crystals after annealing at 800 °C. The vast majority laying parallel to the GF substrate, as shown in (e) by the yellow lines emphasizing the facets and the blue arrows in (f). The red arrows in (f) point to vertical hexagonal crystals, as the one shown in high magnification in the inset.

For comparison, LD- and HD-GFs were coated with MoS<sub>2</sub> using wet chemistry approaches. In this scheme, ~50 mg Ammonium tetrathiomolybdate ((NH<sub>4</sub>)<sub>2</sub>MoS<sub>4</sub>) were dissolved in 30 ml N,N-dimethylformamide (DMF) by ultrasonication. The solution was drop casted (5-10 10μl drops) or the GF was immersed for few minutes in the solution and dried.

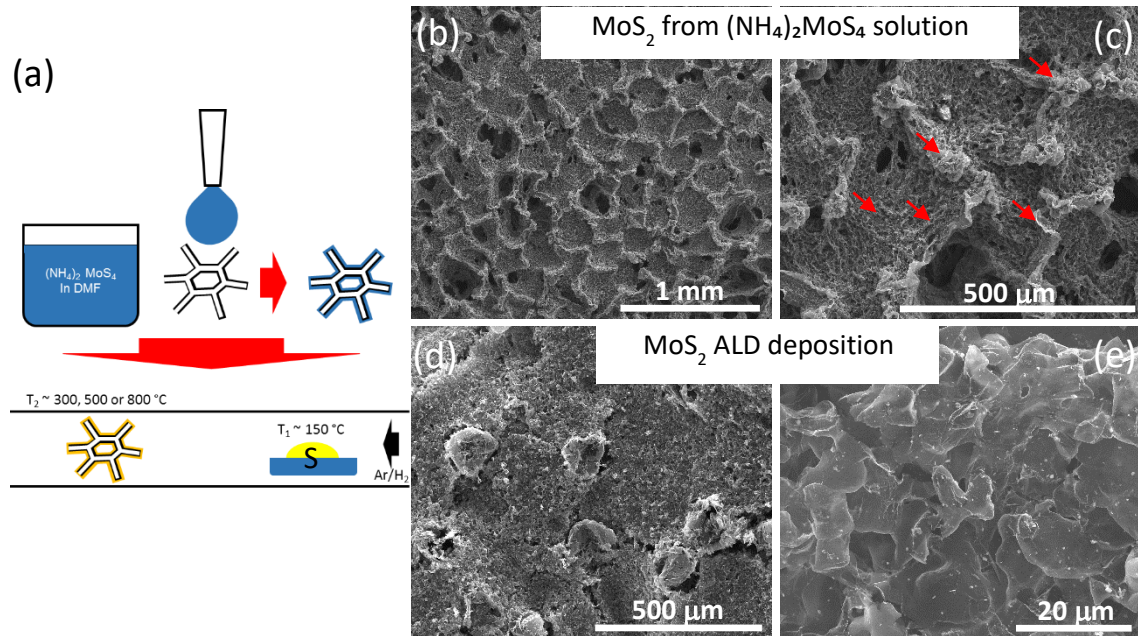

**Figure S6: Comparison between liquid-phase and ALD – derived MoS<sub>2</sub> coatings:** (a) Schematic representation of the liquid-phase methodology. (b)-(c) SEM images showing the morphology of the HD-800 sample prepared via liquid-phase. (d)-(e) HD-800 sample prepared via ALD, which preserves the HD-GF morphology.

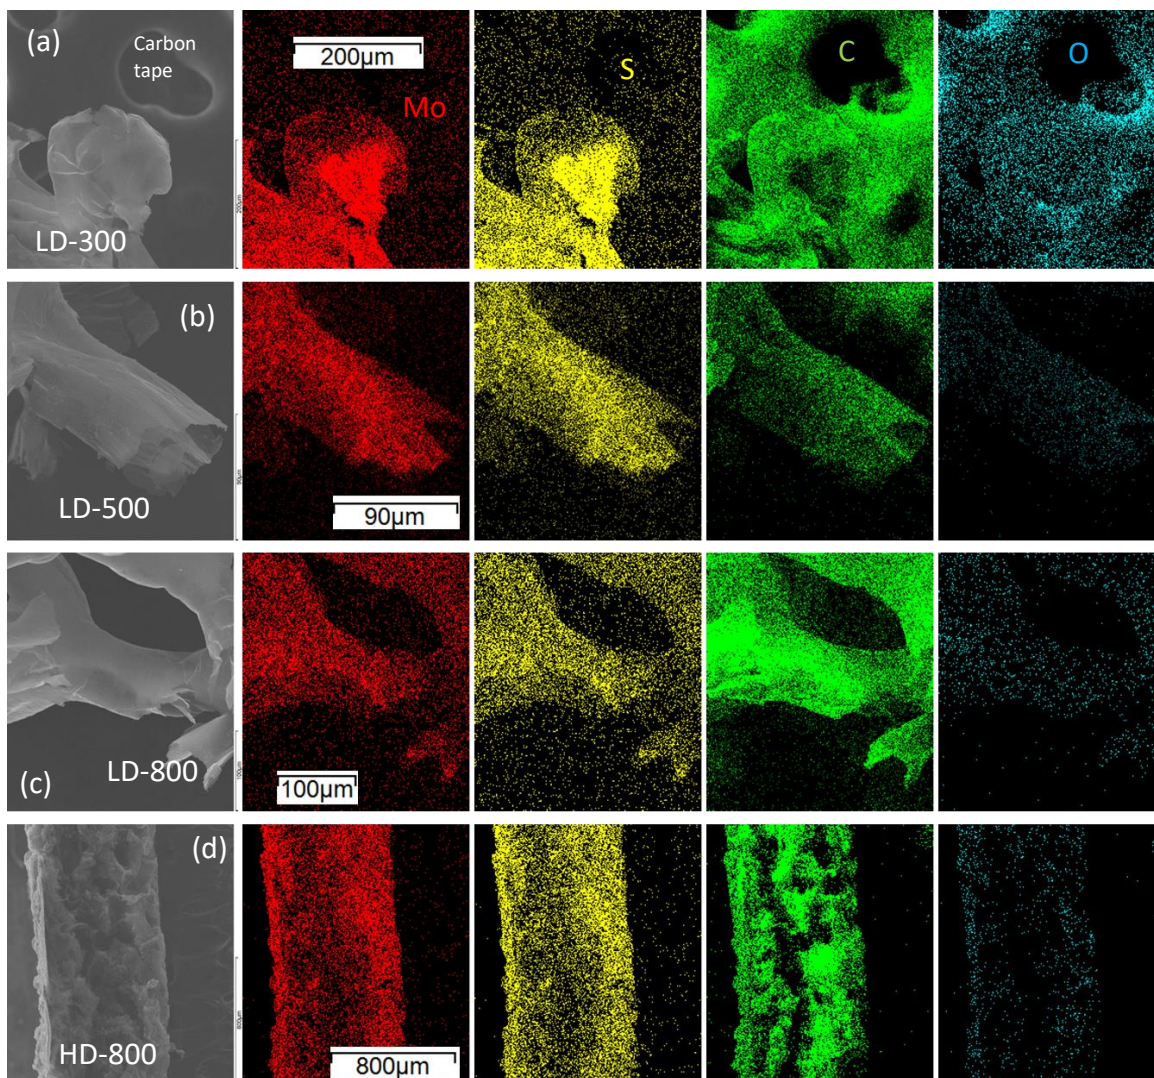

**Figure S7: EDS mapping  $\text{MoS}_2/\text{GFS}$ :** (a) LD-300, (b) LD-500, (c) LD-800 and (d) HD-800. From left to right, SEM image of the mapping area, mapping of the Mo (red), S (yellow), C (green) and O (light blue).

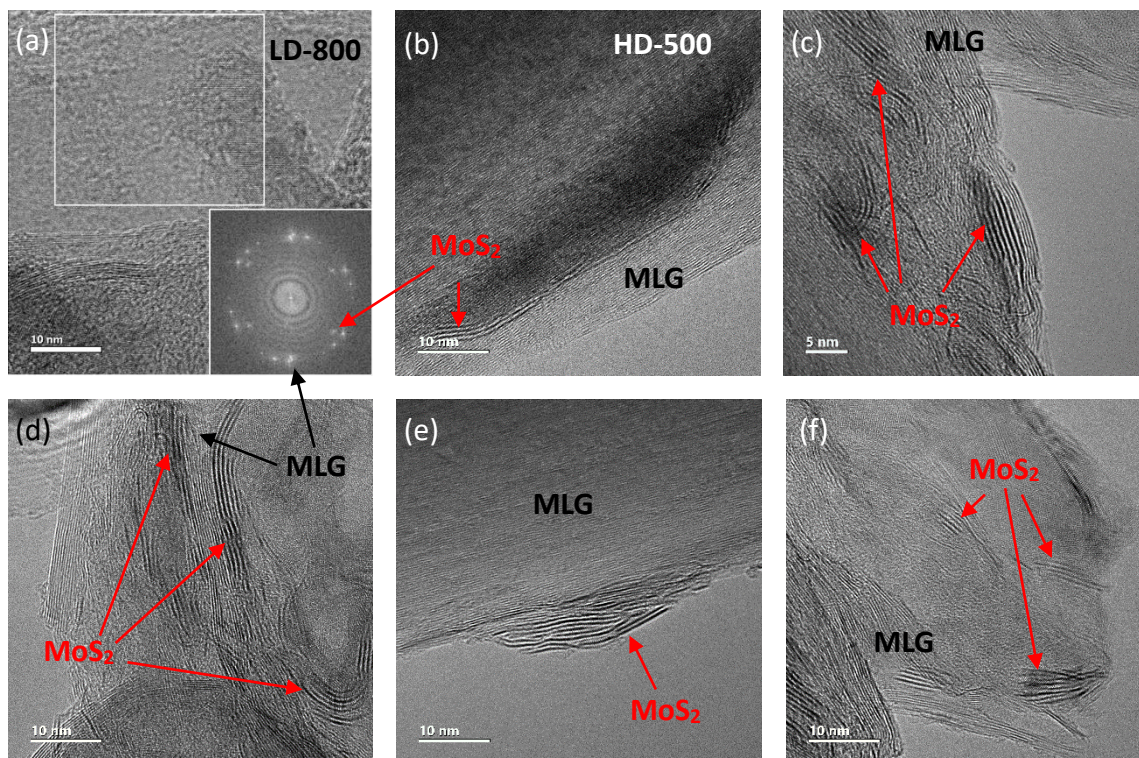

Figure S8: Additional HRTEM images of the MoS<sub>2</sub>/GFs heterostructures.

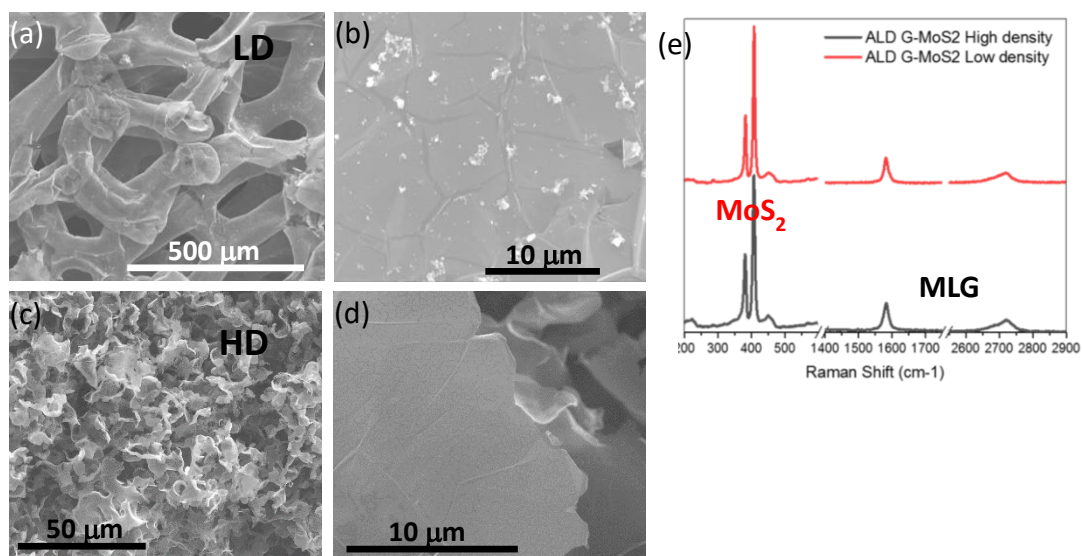

Figure S9: Additional SEM and Raman data. (a)-(b) LD-800, (c)-(d) HD-800. (e) The respective Raman spectra showing the two phases, MoS<sub>2</sub> and MLG characteristic peaks.

Table S2: Raman spectroscopy characterization of the 3D MoS<sub>2</sub>/GF heterostructures.

| Sample                   | FWHM (E <sub>2g</sub> ) [cm <sup>-1</sup> ] | FWHM (A <sub>1g</sub> ) [cm <sup>-1</sup> ] | I(A <sub>1g</sub> )/I(G) |
|--------------------------|---------------------------------------------|---------------------------------------------|--------------------------|
| 500-MoS <sub>2</sub> /GF | 14.2                                        | 12.5                                        | 0.68                     |
| 800-MoS <sub>2</sub> /GF | 9.7                                         | 9.2                                         | 3.32                     |

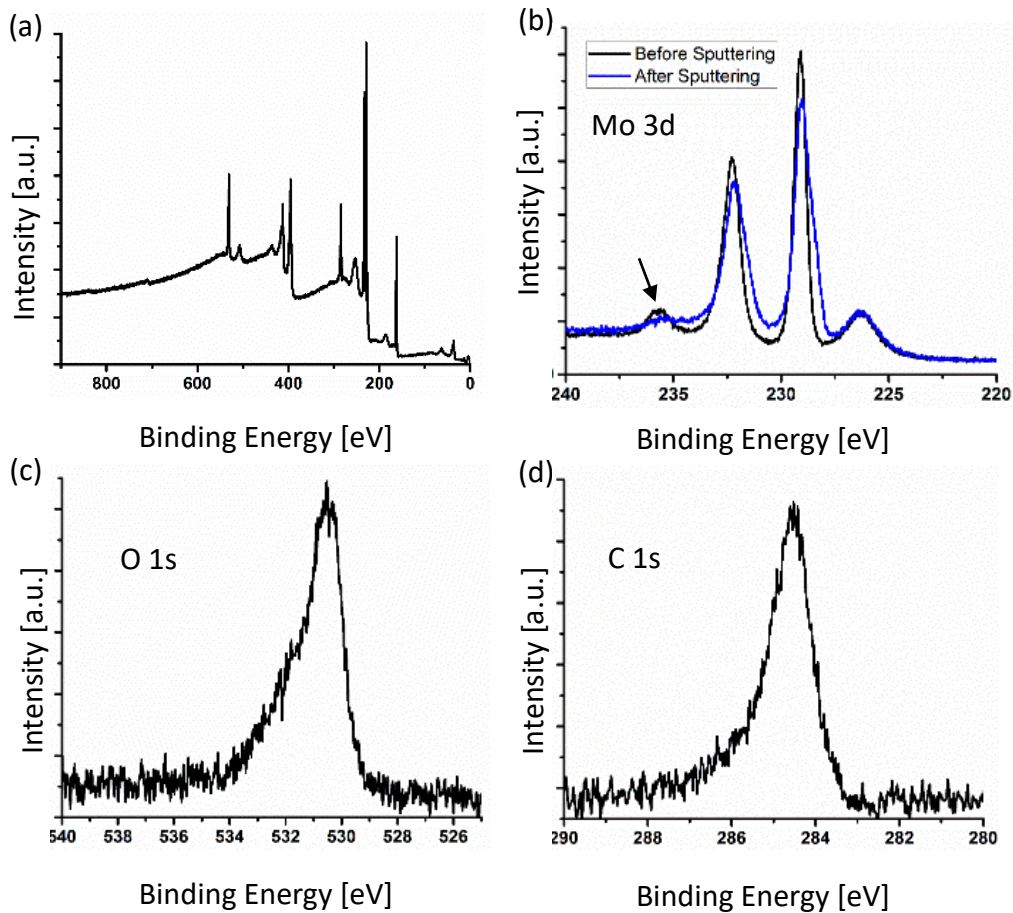

**Figure S10: XPS characterization:** (a) Survey, (b) Mo 3d before and after sputtering showing the reduction of the MoO<sub>3</sub> contribution (black arrow), (c) O 1s and (d) C 1s spectra.



Electrochemical surface area determination was conducted using double layer capacitance at room temperature in the same three-electrode glass cell using a Bio-Logic VSP-300 potentiostat. This method based on double layer capacity voltammetric curves, which recorded in the mere double layer region at various scan rates. Then, a plot of the current in the middle of the potential window vs. scan rate is constructed. Under the condition, where the double layer charging is the only process occurring in that potential range, this plot is a straight line, whose slope gives the value of double layer differential capacity. The surface area can be calculated by referring the obtained capacity to the reference value of capacity per the unit area ( $C_{ref}$ ):

$$ECSA = C / C_{ref}$$

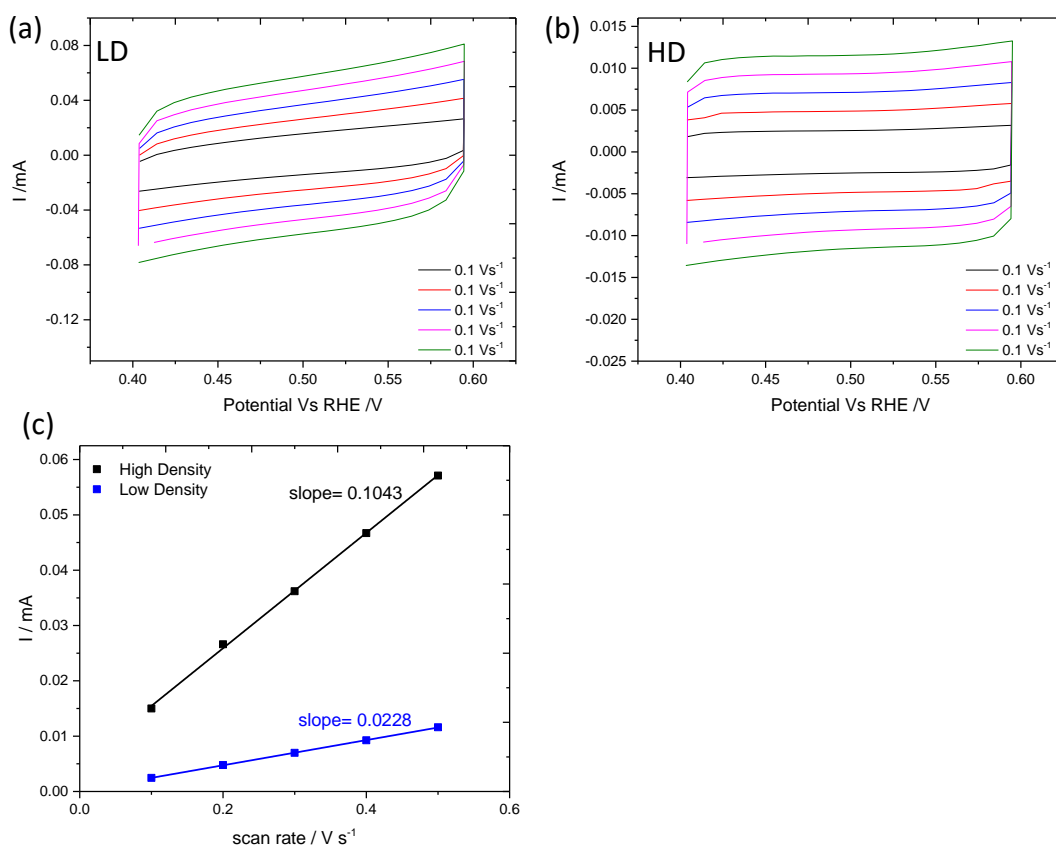

**Figure S11: Electrochemical Surface Area (ECSA) measurements:** (a) –(b) Double layer charging currents recorded with various scan rates in 0.5 M H<sub>2</sub>SO<sub>4</sub> (298 K) for the LD- (a), and HD-GFs (b). (c) Double layer charging current at potential of 0.50 vs. RHE on scan rate for a polycrystalline Pt electrode in 0.5 M H<sub>2</sub>SO<sub>4</sub>.

Table S3- Comparison of HER catalytic performance

| Catalyst                                   | Morphology                 | 3D compatible                         | $\eta(\text{mV})@j=-10\text{mA}/\text{cm}^2$ | Tafel slope (mV/dec) | Ref.             |
|--------------------------------------------|----------------------------|---------------------------------------|----------------------------------------------|----------------------|------------------|
| <b>ALD-MoS<sub>2</sub>/GF</b>              | <b>Thin film coated GF</b> | <b>Y (ALD)</b>                        | <b>180</b>                                   | <b>47</b>            | <b>This work</b> |
| <b>ALD-MoS<sub>2</sub></b>                 | Thin films                 | Y (ALD)                               | ~225                                         | 61                   | [1]              |
| <b>ALD-MoS<sub>2</sub></b>                 | Thin films                 | Y (ALD)                               | ~222                                         | 57                   | [2]              |
| <b>ALD-MoS<sub>2</sub></b>                 | Thin films                 | Y (ALD)                               | >227 @ j=-5mA/cm <sup>2</sup>                | 47                   | [3]              |
| <b>Amorphous MoS<sub>2</sub></b>           | Thin films                 | M (wet-chem)                          | ~225                                         | 40                   | [4]              |
| <b>MoS<sub>2</sub>/Graphene/Ni foam</b>    | nanosheets                 | M (wet-chem)                          | 140                                          | 42                   | [5]              |
| <b>defect-rich MoS<sub>2</sub></b>         | nanosheets                 | M (wet-chem)                          | 180                                          | 50                   | [6]              |
| <b>Oxygen-incorporated MoS<sub>2</sub></b> | nanosheets                 | M (wet-chem)                          | 180                                          | 55                   | [7]              |
| <b>MoS<sub>2</sub></b>                     | film                       | M (vapor-phase)                       | 170                                          | 60                   | [8]              |
| <b>mesoporous MoS<sub>2</sub></b>          | nanosized                  | Y (electrodeposition + sulfurization) | ~250                                         | 50                   | [9]              |
| <b>metallic MoS<sub>2</sub></b>            | nanosheets                 | M (wet-chem)                          | 187                                          | 43                   | [10]             |
| <b>MoS<sub>x</sub>- Graphene</b>           | nanoparticles              | M (wet-chem)                          | ~180                                         | 43                   | [11]             |
| <b>MoS<sub>2</sub>/graphite paper</b>      | flakes                     | M (vapor-phase)                       | 350                                          | 54                   | [12]             |
| <b>MoS<sub>2</sub>/carbon cloth</b>        | nanosheets                 | M (wet-chem)                          | 150                                          | 50                   | [13]             |
| <b>MoS<sub>2</sub>/Graphene/Ni foam</b>    | nanoparticles              | M (wet-chem)                          | 160                                          | 43                   | [14]             |

|                                             |                                            |                                                       |     |       |      |
|---------------------------------------------|--------------------------------------------|-------------------------------------------------------|-----|-------|------|
| <b>Superaerophobic MoS<sub>2</sub> film</b> | nanosize                                   | M (wet-chem)                                          | 200 | 51    | [15] |
| <b>Amorphous MoS<sub>x</sub></b>            | Film                                       | N (PVD)                                               | 180 | 45    | [16] |
| <b>Etched MoS<sub>2</sub> flakes</b>        | Isolated flakes                            | N                                                     | 540 | 138   | [17] |
| <b>Amorphous MoS<sub>2</sub></b>            | Nanosized<br>Amorphous<br>MoS <sub>x</sub> | N                                                     | 145 | 40    | [18] |
| <b>Porous MoS<sub>2</sub></b>               | ~100nm pores                               | M (wet-chem)                                          | 210 | 113   | [19] |
| <b>Li-Intercalated VA-MoS<sub>2</sub></b>   | Li-VA MoS <sub>2</sub><br>films            | M (vapor-phase) +<br>electrochemical<br>intercalation | 210 | 43-47 | [20] |
| <b>VA-MoS<sub>2</sub>/graphene</b>          | MoS <sub>2</sub> /<br>graphene film        | M (vapor-phase)                                       | 420 | 54    | [21] |

Y- Yes, compatible, M-moderate, N – not compatible.

Most of the wet-chemical approaches are labeled with “M” for a moderate compatibility with 3D porous structures due the inducement of morphological changes in small pore sizes, as shown in Figures S5 (b) and (c).

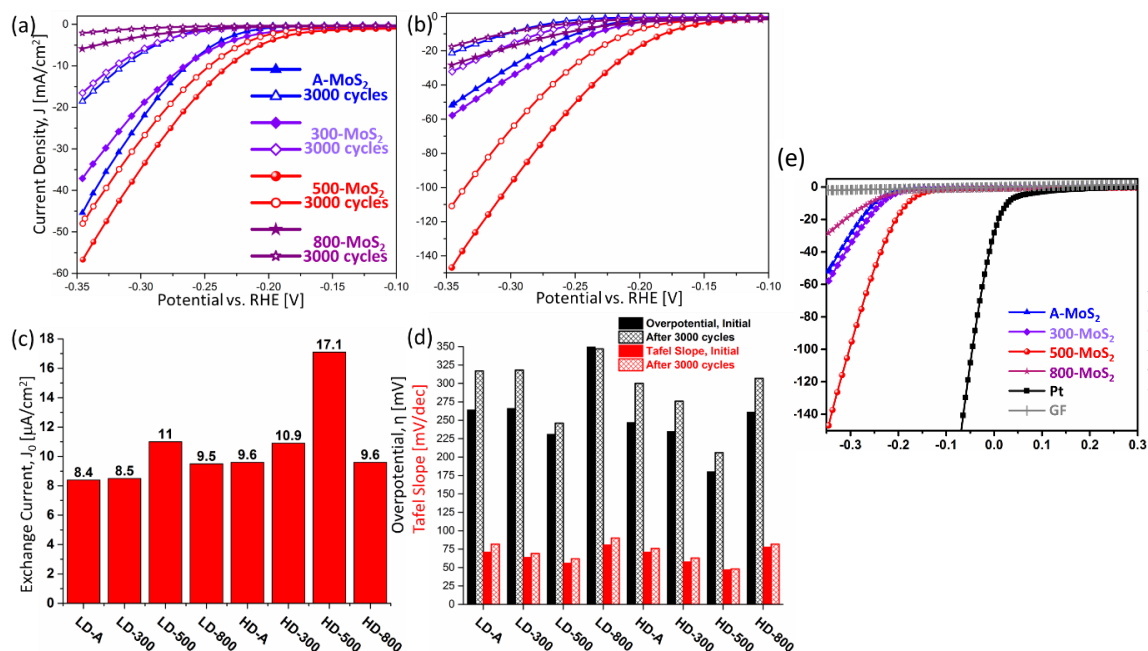

**Figure S12: HER stability measurements:** (a)-(b) Polarization curves for the LD, (a), and HD, (b), foams at the initial and after 3000 cycles. (c) Exchange currents for the different MoS<sub>2</sub>/GFs. (d) Overpotential and Tafel slopes for the different foams at the initial and after 3000 cycles. (e) Polarization curves for the HD foams with the pristine GF data, in grey, confirming it is not active towards HER.

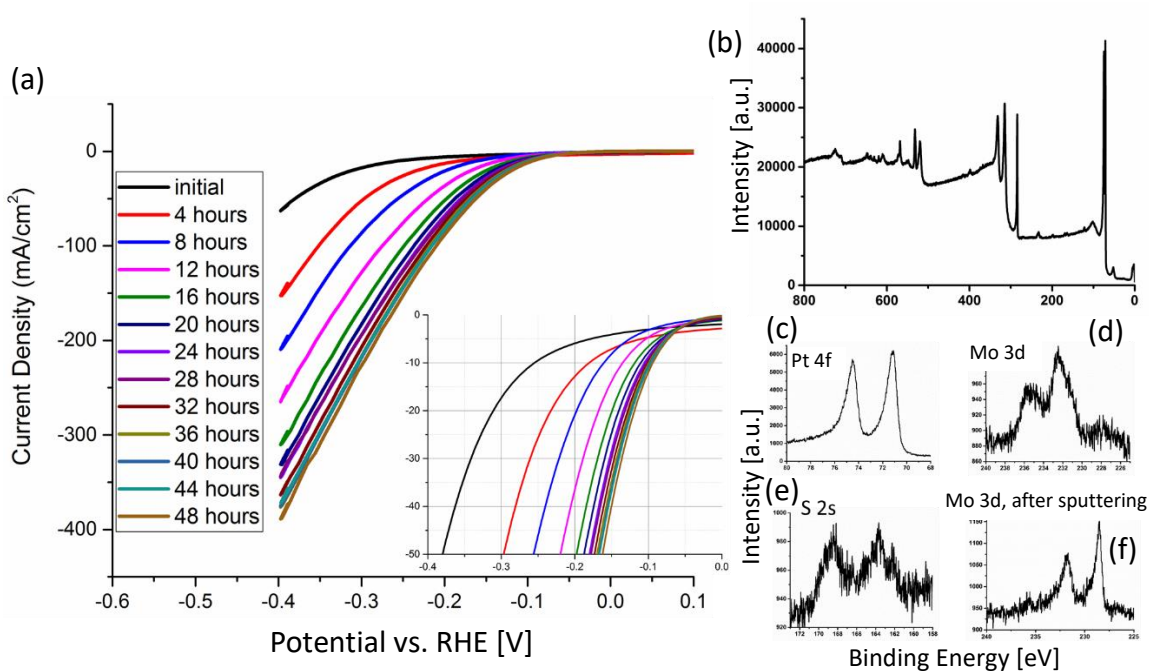

**Figure S13: Effect of Pt as a counter electrode:** (a) Polarization curves obtained with a Pt as a counter electrode, showing that the catalytic performance is increased with time, suggesting there is Pt deposition on the working electrode. (b)-(f) XPS characterization of such working electrode after HER measurements. Survey, (b), Pt 4f, (c), Mo 3d, (d), S 2p, (e) and Mo 3d after sputtering to clean the Pt on the surface, (f).

## References

- [1] T.A. Ho, C. Bae, S. Lee, M. Kim, J.M. Montero-Moreno, J.H. Park, H. Shin, Edge-On MoS<sub>2</sub> Thin Films by Atomic Layer Deposition for Understanding the Interplay between the Active Area and Hydrogen Evolution Reaction, *Chemistry of Materials*, 29 (2017) 7604-7614.
- [2] D.H. Kwon, Z. Jin, S. Shin, W.-S. Lee, Y.-S. Min, A comprehensive study on atomic layer deposition of molybdenum sulfide for electrochemical hydrogen evolution, *Nanoscale*, 8 (2016) 7180-7188.
- [3] S. Shin, Z. Jin, D.H. Kwon, R. Bose, Y.-S. Min, High Turnover Frequency of Hydrogen Evolution Reaction on Amorphous MoS<sub>2</sub> Thin Film Directly Grown by Atomic Layer Deposition, *Langmuir*, 31 (2015) 1196-1202.
- [4] D. Merki, S. Fierro, H. Vrubel, X. Hu, Amorphous molybdenum sulfide films as catalysts for electrochemical hydrogen production in water, *Chemical Science*, 2 (2011) 1262-1267.
- [5] P. Zhu, Y. Chen, Y. Zhou, Z. Yang, D. Wu, X. Xiong, F. Ouyang, Defect-rich MoS<sub>2</sub> nanosheets vertically grown on graphene-protected Ni foams for high efficient electrocatalytic hydrogen evolution, *International Journal of Hydrogen Energy*, 43 (2018) 14087-14095.
- [6] J.F. Xie, H. Zhang, S. Li, R.X. Wang, X. Sun, M. Zhou, J.F. Zhou, X.W. Lou, Y. Xie, Defect-Rich MoS<sub>2</sub> Ultrathin Nanosheets with Additional Active Edge Sites for Enhanced Electrocatalytic Hydrogen Evolution, *Advanced Materials*, 25 (2013) 5807-+.

- [7] J. Xie, J. Zhang, S. Li, F. Grote, X. Zhang, H. Zhang, R. Wang, Y. Lei, B. Pan, Y. Xie, Controllable Disorder Engineering in Oxygen-Incorporated MoS<sub>2</sub> Ultrathin Nanosheets for Efficient Hydrogen Evolution, *Journal of the American Chemical Society*, 135 (2013) 17881-17888.
- [8] H. Li, C. Tsai, A.L. Koh, L. Cai, A.W. Contryman, A.H. Fragapane, J. Zhao, H.S. Han, H.C. Manoharan, F. Abild-Pedersen, J.K. Nørskov, X. Zheng, Activating and optimizing MoS<sub>2</sub> basal planes for hydrogen evolution through the formation of strained sulphur vacancies, *Nature Materials*, 15 (2016) 48-+.
- [9] J. Kibsgaard, Z. Chen, B.N. Reinecke, T.F. Jaramillo, Engineering the surface structure of MoS<sub>2</sub> to preferentially expose active edge sites for electrocatalysis, *Nature Materials*, 11 (2012) 963-969.
- [10] M.A. Lukowski, A.S. Daniel, F. Meng, A. Forticaux, L. Li, S. Jin, Enhanced Hydrogen Evolution Catalysis from Chemically Exfoliated Metallic MoS<sub>2</sub> Nanosheets, *Journal of the American Chemical Society*, 135 (2013) 10274-10277.
- [11] Z. Pu, Q. Liu, A.M. Asiri, A.Y. Obaid, X. Sun, Graphene film-confined molybdenum sulfide nanoparticles: Facile one-step electrodeposition preparation and application as a highly active hydrogen evolution reaction electrocatalyst, *Journal of Power Sources*, 263 (2014) 181-185.
- [12] G.R. Bhimanapati, T. Hankins, Y. Lei, R.A. Vilá, I. Fuller, M. Terrones, J.A. Robinson, Growth and Tunable Surface Wettability of Vertical MoS<sub>2</sub> Layers for Improved Hydrogen Evolution Reactions, *ACS Applied Materials & Interfaces*, 8 (2016) 22190-22195.
- [13] Y. Yan, B. Xia, N. Li, Z. Xu, A. Fisher, X. Wang, Vertically oriented MoS<sub>2</sub> and WS<sub>2</sub> nanosheets directly grown on carbon cloth as efficient and stable 3-dimensional hydrogen-evolving cathodes, *Journal of Materials Chemistry A*, 3 (2015) 131-135.
- [14] Y.-H. Chang, C.-T. Lin, T.-Y. Chen, C.-L. Hsu, Y.-H. Lee, W. Zhang, K.-H. Wei, L.-J. Li, Highly Efficient Electrocatalytic Hydrogen Production by MoS<sub>x</sub> Grown on Graphene-Protected 3D Ni Foams, *Advanced Materials*, 25 (2013) 756-760.
- [15] Z.Y. Lu, W. Zhu, X.Y. Yu, H.C. Zhang, Y.J. Li, X.M. Sun, X.W. Wang, H. Wang, J.M. Wang, J. Luo, X.D. Lei, L. Jiang, Ultrahigh Hydrogen Evolution Performance of Under-Water "Superaerophobic" MoS<sub>2</sub> Nanostructured Electrodes, *Advanced Materials*, 26 (2014) 2683-2687.
- [16] F. Xi, P. Bogdanoff, K. Harbauer, P. Plate, C. Hoelm, J. Rappich, B. Wang, X. Han, R. van de Krol, S. Fiechter, Structural Transformation Identification of Sputtered Amorphous MoS<sub>x</sub> as an Efficient Hydrogen-Evolving Catalyst during Electrochemical Activation, *Acs Catalysis*, 9 (2019) 2368-2380.
- [17] P. Zhang, H. Xiang, L. Tao, H. Dong, Y. Zhou, T.S. Hu, X. Chen, S. Liu, S. Wang, S. Garaj, Chemically activated MoS<sub>2</sub> for efficient hydrogen production, *Nano Energy*, 57 (2019) 535-541.
- [18] B. Li, L. Jiang, X. Li, Z. Cheng, P. Ran, P. Zuo, L. Qu, J. Zhang, Y. Lu, Controllable Synthesis of Nanosized Amorphous MoS<sub>x</sub> Using Temporally Shaped Femtosecond Laser for Highly Efficient Electrochemical Hydrogen Production, *Advanced Functional Materials*, 29 (2019).
- [19] S.R. Kadam, U.V. Kawade, R. Bar-Ziv, S.W. Gosavi, M. Bar-Sadan, B.B. Kale, Porous MoS<sub>2</sub> Framework and Its Functionality for Electrochemical Hydrogen Evolution Reaction and Lithium Ion Batteries, *ACS Applied Energy Materials*, 2 (2019) 5900-5908.
- [20] H. Wang, Z. Lu, S. Xu, D. Kong, J.J. Cha, G. Zheng, P.-C. Hsu, K. Yan, D. Bradshaw, F.B. Prinz, Y. Cui, Electrochemical tuning of vertically aligned MoS<sub>2</sub> nanofilms and its application in improving hydrogen evolution reaction, *Proceedings of the National Academy of Sciences*, 110 (2013) 19701-19706.
- [21] P. Gnanasekar, D. Periyanaounder, J. Kulandaivel, Vertically aligned MoS<sub>2</sub> nanosheets on graphene for highly stable electrocatalytic hydrogen evolution reactions, *Nanoscale*, 11 (2019) 2439-2446.
